# Supplementary material
Source: publisher site journal article supplement (https://www.dovepress.com/article/479202)
Supplement: Supplementary file 1 [file get_supplementary_file.php]

**Appendix S1**

| Final version of the Family Coping Scale for Patients with Chronic Heart Failure | |
| --- | --- |
| Dimension | Item |
| **strategies for better management of CHF** | We find ways to help pay for treatment (e.g. borrowing, lending). |
| We can recognize and act on heart failure symptoms (e.g. dyspnea, oedema, in/out breathing). |
| We are proactively seeking ways to manage chronic heart failure. |
| We have developed expertise in heart failure to deal with the current situation. |
| We seek professional mental health support to manage chronic heart failure. |
| We know how to cope with chronic heart failure. |
| **psychological coping** | Life and death are unpredictable, so we just have to accept the chronic heart failure and work towards the good. |
| We continue to remain positive in the face of chronic heart failure. |
| We try to manage our moods and stay happy to cope with chronic heart failure. |
| We have hobbies as a means of relaxing our minds. |
| We are more confident about the treatment of chronic heart failure. |
| **substantial support by family members** | When a patient is sick and hospitalized, family members visit from time to time. |
| When a patient is sick and hospitalized, family members take turns to take care of him/her. |
| After the patient is discharged from the hospital, family members often call or visit the patient at home to see if he/she is ok. |
| We will spend a lot of money on the treatment of the disease, and we are worried about losing both money and people as well. |
| **emergency coping** | When a patient is unwell, we visit the hospital promptly. |
| We go to the best hospital to save patients' lives during the episode of the disease. |
| We will overcome our existing financial burden and try our best to treat the disease during hospitalization. |
| **overall heart failure awareness** | We need to buy the medical equipment to cope with chronic heart failure (e.g. ventilators). |
| We know that chronic heart failure requires lifelong medication. |
| Chronic heart failure is a chronic condition that requires us to treat it slowly to relieve the symptoms. |
| **patients' health behavior** | The patients in our family have their blood pressure taken every day. |
| The patients in our family regularly visit the hospital for follow-up checks. |
| The patients in our family are more regular in their daily lives (e.g., daily diet and rest). |
